23

## 24 **Abstract**

25 **BACKGROUND:** Maternal mortality is still high among adolescent women worldwide. This  
26 study explores the influence of socio-demographic characteristics on having four or more  
27 antenatal care (ANC4+) visits and use of Skilled Birth Attendants (SBA) among women in four  
28 island countries: Indonesia, the Philippines, Papua New Guinea, and Timor-Leste.

29

30 **METHODS:** Data from Demographic and Health Surveys of Indonesia, the Philippines, Papua  
31 New Guinea, and Timor-Leste were used. We studied the relationship of utilization of ANC4+  
32 visits and SBA among women aged 15-49 years with socio-demographic variables including  
33 women's age at first birth, age at first cohabitation, age at last birth, age groups, place of  
34 residence, education, wealth, birth order, number of living children, household ownership of a  
35 vehicle, and reproductive health knowledge. Descriptive, bivariate, and multivariable logistic  
36 regression analyses were performed.

37

38 **RESULTS:** Women at first birth before age 18 ranged from 18% in Indonesia to 31% in Papua  
39 New Guinea. In all countries, wealth status and having knowledge on modern contraceptives  
40 were significant predictors for having ANC4+ visits and SBA use. In Indonesia, women older  
41 than 25 were 1.38 times (95% CI=1.09-1.74) more likely to use SBA than those younger than 19.  
42 Each country demonstrated different patterns of ANC4+ visits and use of SBA that varied by  
43 education, place of residence, birth order, number of living children, and household ownership of  
44 a vehicle.

45

46 **CONCLUSION:** Having a high number of adolescent births highlighted a need for reproductive  
47 health knowledge reach to the young women, which can achieve through ANC4+ visits and use  
48 of SBA.

49

50 **Key Words:** Maternal health; Antenatal care; Skilled birth attendants; Age at first birth; Asia-  
51 Pacific; Island countries; Indonesia; the Philippines; Papua New Guinea; Timor-Leste

52

53

## 54 **Introduction**

55 Maternal mortality is a major concern in low- and lower-middle-income countries, with the  
56 estimated global Maternal Mortality Ratio (MMR) remaining at about 211 per 100,000 live  
57 births (1). 75% of maternal mortality is due to complications from pregnancy and childbirth,  
58 such as postpartum bleeding, infections, and pregnancy-induced hypertension (1). In addition,  
59 maternal age at first birth younger than 18 poses an increased risk for complications (2).

60 The Sustainable Development Goals have a variety of targets (3), including targets to reduce  
61 MMR. Target 3.1 is to have less than 70 MMR per 100,000 live births by 2030 (3). The World  
62 Health Organization (WHO) also set five coverage maternal health related targets in 2021, of  
63 which two of them are utilization of four or more antenatal care (ANC4+) visits by 90% of  
64 pregnant women and to have 90% of births to use a Skilled Birth Attendant (SBA) by 2025 (4,  
65 5). Garenne et al. (1997) found that lack of ANC visits increased the odds of maternal mortality  
66 almost 16 times more than those who had ANC visits (6). All SBAs (medical doctors, nurses,  
67 and midwives) play important roles as they are trained to assess life-threatening conditions (7).  
68 Compared to higher-income island countries in the region, such as Singapore and New Zealand,  
69 which had MMR of less than 10 per 100,000 live births in 2017, the lower-income countries such  
70 as Indonesia, the Philippines, Papua New Guinea, and Timor-Leste still have higher MMR at  
71 273, 109, 145, and 142 per 100,000 live births respectively in 2018 (8). These island countries  
72 show a greater diversity of culture and geography which influence the age at first birth and  
73 pregnant women's access to health care services. For example, Timor-Leste is extremely

74 mountainous, while the others have numerous islands that make health care access difficult for  
75 many pregnant women (9, 10). Although SBA is common in the high and upper-middle-income  
76 countries in the Asia and the Pacific region, they are scarce in these countries (Organization for  
77 Economic Co-operation and Development (11).

78 This study's overall objective was to explore the relationships between the age at first birth and  
79 the use of maternal health services (i.e., use of ANC4+ and SBA) among women in the above-  
80 mentioned four island countries. Although WHO recently changed recommended ANC visits  
81 from ANC4+ to ANC8+, our analyses applied ANC4+ visits because the data used in this paper  
82 were collected before the recommendation was made, and the targets for ANC4+ visits and use  
83 of SBA are still aiming to reach by 2025 (4, 5). This study has two specific aims. The first aim  
84 was to examine the association between the age at first birth and utilization of maternal health  
85 services (i.e., use of ANC4+ visits during pregnancy and SBA) in four island countries  
86 mentioned above. We hypothesized that older women at first birth would be more likely to have  
87 ANC4+ visits and use an SBA than the younger women while controlling for other variables.  
88 The second aim was to examine the relationship between maternal health services (i.e., use of  
89 ANC4+ and SBA) and demographic characteristics (age, place of residence, education, wealth  
90 status, age at first cohabitation; birth orders, number of children), reproductive health knowledge  
91 (knowledge of modern contraceptives, ovulation, pregnancy), and household ownership of a  
92 vehicle (having a car/truck or a motorcycle/scooter).

93 The findings from this paper will inform the decision-makers of the current situations and factors  
94 that influence the use of maternal health services and will provide appropriate recommendations  
95 to reduce maternal mortality in this higher-risk age group.

## 96 **Methods**

### 97 **Data source**

98 Nationally representative data from the Demographic Health Surveys (DHS) of Indonesia  
99 (IDHS:2017) (12), the Philippines (PDHS: 2017) (13), Timor-Leste (TLDHS: 2016) (14), and  
100 Papua New Guinea (PNGDHS: 2016-2018) (15) were used. For each survey, 49,627 Indonesian  
101 women, 25,074 Filipino women, 15,198 Papua New Guinean women, and 12,607 Timor-Leste  
102 women participated. The DHS surveys were reviewed and approved by the Institutional Review  
103 Board (IRB) of Inner-City fund (ICF) in collaboration with respective country's Ministry of  
104 Health (16). ICF ensures that the DHSs complies with appropriate guidelines and regulations.  
105 For DHS conducted in the included countries, written informed consent was obtained from the  
106 respondents (16). If the respondents were aged 15-17, parental or guardian consent was taken  
107 (12-15).

108 The outcome variables, having ANC4+ visits and using an SBA at childbirth, were dichotomous.  
109 The predictor variables were maternal age at first birth (<18, 19-24, >24), age at first  
110 cohabitation (<18, 19-24, >24), age at last birth (<18, 19-24, >24), age groups (<18, 19-24,  
111 >24), place of residence (urban and rural), education (no education/primary education, secondary  
112 education, higher education), standardized wealth index (poor, middle and rich), birth order (BO)  
113 of the children (BO=1, BO=2, BO=3, BO=4 and above) and the number of children (having a  
114 child, two children, three children, and four and above). We included three reproductive health-  
115 related knowledge variables (knowledge on timing of ovulation, getting pregnant before the first  
116 period after giving birth to a baby, and modern contraceptive methods). We also included two  
117 transportation indicators: whether the household has a car/truck and if the household has a  
118 motorcycle/scooter.

119 We performed descriptive analyses (weighted prevalence and Chi-square test) to observe the  
120 association between the outcome and independent variables. Multivariable analyses (logistic  
121 regression) were conducted to observe the relationship between the outcome variables (use of  
122 ANC4+visits and SBA) and exposure variable (age at first birth) when controlling for other  
123 independent variables. In addition, as we used four age-related variables, we also checked for  
124 multicollinearity. All the analyses were applied survey weights and performed using Stata 17.0  
125 (17) (Stata.com, n.d.).

## 126 **Study population**

127 For this analysis, the number of respondents who answered the question of ANC were 17,779  
128 from Indonesia, 7,992 from the Philippines, 9,057 from Papua New Guinea, and 7,211 from  
129 Timor-Leste. On the other hand, the number of respondents answering the question of SBA  
130 were 17,785 from Indonesia, 10,551 from the Philippines, 9,204 from Papua New Guinea, and  
131 7,211 from Timor-Leste, respectively.

## 132 **Results**

### 133 **Descriptive and bivariate analyses**

134 The number of women who had ANC4+ visits ranged from 48% in Papua New Guinea to 90% in  
135 Indonesia. The use of SBA ranged from 40% (Indonesia) to 84% (Philippines). The percentages  
136 of women giving birth before age 18 ranged from 18% in Indonesia to 31% in Papua New  
137 Guinea. Only in Indonesia, bivariate results showed that that all independent variables were  
138 significantly related to ANC4+ visits (Table 1).

Table 1: Bivariate analyses of having ANC4+ visits (weighted frequency and percentage) in four island countries in Asia and the Pacific region

---

| Countries and original observations | Indonesia:<br>49, 627           |                | Philippines:<br>25, 074 |               | Papua New Guinea:<br>15, 198 |               | Timor-Leste:<br>12, 607 |               |
|-------------------------------------|---------------------------------|----------------|-------------------------|---------------|------------------------------|---------------|-------------------------|---------------|
|                                     | Outcome variables: ANC4+ visits |                |                         |               |                              |               |                         |               |
| Sociodemographic Characteristics    | No: N (%)                       | Yes: N (%)     | No: N (%)               | Yes: N (%)    | No: N (%)                    | Yes: N (%)    | No: N (%)               | Yes: N (%)    |
| <b>Age at first birth</b>           |                                 | <b>17,779</b>  |                         | <b>7, 992</b> |                              | <b>9, 057</b> |                         | <b>7, 211</b> |
| <19                                 | 669 (17)                        | 2,706 (83)     | 447 (20)                | 1, 491 (80)   | 1,314 (54)                   | 1,228 (46)    | 413 (28)                | 1, 056 (72)   |
| 19-24                               | 1, 197 (10)                     | 8,373 (90)     | 640 (13)                | 3, 646 (87)   | 2,360 (52)                   | 2,625 (48)    | 1,036 (24)              | 3, 230 (76)   |
| >25                                 | 421 (7)                         | 4,408 (94)     | 197 (9)                 | 1, 571 (91)   | 686 (48)                     | 844 (52)      | 346 (22)                | 1, 130 (78)   |
|                                     |                                 | P < .001       |                         | P < .001      |                              | P = .203      |                         | P = .046      |
| <b>Age at first cohabitation</b>    |                                 | <b>17,750</b>  |                         | <b>7, 683</b> |                              | <b>8, 768</b> |                         | <b>7, 179</b> |
| <19                                 | 988 (15)                        | 4, 651 (85)    | 608 (18)                | 2, 196 (82)   | 1, 821 (54)                  | 1, 741 (46)   | 673 (27)                | 1, 832 (73)   |
| 19-24                               | 986 (7)                         | 7,753 (91)     | 481 (11)                | 3, 031 (89)   | 1, 926 (51)                  | 2, 196 (49)   | 879 (23)                | 2, 759 (77)   |
| >25                                 | 306 (7)                         | 3,066 (93)     | 141 (8)                 | 1, 226 (92)   | 473 (49)                     | 611 (51)      | 236 (22)                | 800 (78)      |
|                                     |                                 | P < .001       |                         | P < .001      |                              | P = .123      |                         | P = .013      |
| <b>Age at last birth</b>            |                                 | <b>16, 998</b> |                         | <b>7, 992</b> |                              | <b>8, 518</b> |                         | <b>6, 851</b> |
| <19                                 | 93 (18)                         | 331 (82)       | 136 (23)                | 393 (77)      | 118 (42)                     | 134 (58)      | 36 (29)                 | 1, 213 (78)   |
| 19-24                               | 522 (10)                        | 3,233 (90)     | 366 (13)                | 2, 008 (87)   | 1, 105 (52)                  | 1, 243 (48)   | 355 (22)                | 1, 213 (78)   |
| >25                                 | 1, 574 (10)                     | 11,245 (90)    | 782 (13)                | 4, 307 (87)   | 2, 867 (52)                  | 3, 501 (48)   | 1, 333 (25)             | 3, 841 (75)   |
|                                     |                                 | P < .001       |                         | P < .001      |                              | P = .245      |                         | P = .105      |
| <b>Age group and SBA</b>            |                                 | <b>17,779</b>  |                         | <b>7, 992</b> |                              | <b>9, 507</b> |                         | <b>7, 211</b> |
| <19                                 | 107 (20)                        | 330 (80)       | 83 (21)                 | 258 (79)      | 160 (50)                     | 146 (50)      | 52 (26)                 | 121 (74)      |
| 19-24                               | 389 (10)                        | 2,411 (90)     | 298 (16)                | 1, 318 (84)   | 895 (53)                     | 1, 004 (4)    | 273 (22)                | 979 (78)      |
| 25 and above                        | 1, 791 (10)                     | 12,751 (90)    | 903 (13)                | 5, 132 (88)   | 3, 305 (52)                  | 3, 547 (48)   | 1, 470 (24)             | 4, 316 (76)   |
|                                     |                                 | P < .001       |                         | P < .001      |                              | P = .888      |                         | P = .338      |
| <b>Place of residence</b>           |                                 | <b>17,779</b>  |                         | <b>7, 992</b> |                              | <b>9, 057</b> |                         | <b>7, 211</b> |
| Urban                               | 780 (7)                         | 7,947 (93)     | 317 (12)                | 2, 285 (88)   | 661 (38)                     | 1, 359 (62)   | 347 (13)                | 1, 787 (87)   |
| Rural                               | 1, 507 (13)                     | 7,545 (87)     | 967 (15)                | 4, 423 (85)   | 3, 699 (54)                  | 3, 338 (46)   | 1, 448 (29)             | 3, 629 (71)   |
|                                     |                                 | P < .001       |                         | P = .029      |                              | P < .001      |                         | P < .001      |
| <b>Education</b>                    |                                 | <b>17,779</b>  |                         | <b>7, 992</b> |                              | <b>9, 057</b> |                         | <b>7, 211</b> |
| No education/Primary education      | 988 (18)                        | 3,715 (82)     | 517 (28)                | 1, 121 (72)   | 3, 543 (58)                  | 2, 900 (42)   | 1, 087 (34)             | 2, 070 (66)   |
| Middle                              | 1,071 (8)                       | 8,812 (92)     | 575 (14)                | 3, 370 (87)   | 729 (33)                     | 1, 547 (67)   | 634 (18)                | 2, 834 (82)   |
| Higher                              | 228 (4)                         | 2,965 (96)     | 192 (6)                 | 2, 217 (94)   | 88 (37)                      | 250 (63)      | 74 (11)                 | 512 (89)      |
|                                     |                                 | P < .001       |                         | P < .001      |                              | P < .001      |                         | P < .001      |
| <b>Wealth</b>                       |                                 | <b>17, 779</b> |                         | <b>7, 992</b> |                              | <b>9, 057</b> |                         | <b>7, 211</b> |
| Poorest/Poorer                      | 1, 653 (17)                     | 6, 758 (83)    | 978 (20)                | 3, 582 (81)   | 1, 934 (63)                  | 1, 1125 (37)  | 1, 055 (36)             | 1, 889 (64)   |
| Middle                              | 300 (8)                         | 2, 947 (92)    | 170 (12)                | 1, 274 (88)   | 858 (50)                     | 872 (50)      | 360 (25)                | 1, 105 (75)   |
| Richest/Richer                      | 334 (4)                         | 5, 787 (96)    | 136 (6)                 | 1, 852 (94)   | 1, 568 (41)                  | 2, 700 (59)   | 380 (12)                | 2, 422 (88)   |
|                                     |                                 | P < .001       |                         | P < .001      |                              | P < .001      |                         | P < .001      |
| <b>Knowledge on ovulation</b>       |                                 | <b>17, 767</b> |                         | <b>7, 992</b> |                              | <b>9, 010</b> |                         | <b>7, 211</b> |
| No                                  | 1, 925 (11)                     | 11, 474 (89)   | 992 (14)                | 4, 782 (86)   | 3, 514 (53)                  | 3, 539 (47)   | 1, 626 (25)             | 4, 797 (76)   |
| Yes                                 | 362 (7)                         | 4, 006 (93)    | 292 (12)                | 1, 926 (88)   | 824 (48)                     | 1, 133 (53)   | 169 (21)                | 619 (79)      |

|                                          |             |                |             |               |             |               |             |               |
|------------------------------------------|-------------|----------------|-------------|---------------|-------------|---------------|-------------|---------------|
|                                          |             | P < .001       |             | P = .075      |             | P = .043      |             | P = .176      |
| <b>Knowledge on getting pregnant</b>     |             | <b>17, 774</b> |             | <b>7, 992</b> |             | <b>9, 002</b> |             | <b>7, 211</b> |
| No                                       | 1, 192 (13) | 6, 234 (87)    | 294 (16)    | 1, 256 (84)   | 1, 946 (58) | 1, 705 (43)   | 1, 125 (29) | 2, 696 (71)   |
| Yes                                      | 1, 095 (9)  | 9, 253 (92)    | 990 (13)    | 5, 452 (87)   | 2, 385 (48) | 2, 966 (52)   | 670 (19)    | 2, 720 (81)   |
|                                          |             | P < .001       |             | P = .053      |             | P < .001      |             | P < .001      |
| <b>Knowledge on modern contraception</b> |             | <b>17, 779</b> |             | <b>7, 992</b> |             | <b>9, 057</b> |             | <b>7, 211</b> |
| No                                       | 69 (82)     | 26 (18)        | 26 (80)     | 7 (20)        | 861 (81)    | 219 (19)      | 549 (42)    | 728 (58)      |
| Yes                                      | 2, 218 (10) | 15, 466 (90)   | 1, 258 (13) | 6, 701 (87)   | 3, 499 (47) | 4, 478 (53)   | 1, 246 (20) | 4, 688 (80)   |
|                                          |             | P < .001       |             | P < .001      |             | P < .001      |             | P < .001      |
| <b>Birth Order (BO)</b>                  |             | <b>17, 779</b> |             | <b>7, 992</b> |             | <b>9, 507</b> |             | <b>7, 211</b> |
| BO=1                                     | 627 (8)     | 5, 218 (92)    | 283 (11)    | 1, 913 (90)   | 955 (46)    | 1, 299 (54)   | 374 (20)    | 1, 372 (80)   |
| BO=2                                     | 570 (8)     | 5, 018 (92)    | 276 (12)    | 1, 801 (88)   | 870 (51)    | 1, 058 (49)   | 306 (21)    | 1, 120 (79)   |
| BO=2                                     | 407 (11)    | 2,943 (90)     | 216 (13)    | 1, 282 (87)   | 810 (53)    | 821 (47)      | 289 (24)    | 915 (76)      |
| BO=3                                     | 683 (22)    | 2, 313 (78)    | 509 (19)    | 1, 712 (81)   | 1, 725 (57) | 1, 519 (43)   | 826 (29)    | 2, 009 (71)   |
|                                          |             | P < .001       |             | P < .001      |             | P < .001      |             | P < .001      |
| <b>Number of Children</b>                |             | <b>17, 704</b> |             | <b>7, 964</b> |             | <b>9, 000</b> |             | <b>7, 173</b> |
| One child                                | 481 (7)     | 4, 581 (93)    | 287 (10)    | 1, 958 (90)   | 656 (42)    | 961 (58)      | 248 (21)    | 856 (79)      |
| Two children                             | 608 (8)     | 5, 526 (92)    | 280 (12)    | 1, 826 (88)   | 913 (52)    | 1, 157 (49)   | 308 (18)    | 1, 326 (82)   |
| Three children                           | 495 (12)    | 3, 140 (89)    | 218 (13)    | 1, 275 (87)   | 908 (53)    | 925 (47)      | 317 (23)    | 1, 031 (77)   |
| Four children                            | 681 (23)    | 2, 192 (77)    | 488 (19)    | 1, 632 (81)   | 1, 849 (56) | 1, 631 (44)   | 904 (29)    | 2, 183 (71)   |
|                                          |             | P < .001       |             | P < .001      |             | P < .001      |             | P < .001      |
| <b>Household has a car</b>               |             | <b>17, 769</b> |             | <b>7, 992</b> |             | <b>9, 037</b> |             | <b>7, 211</b> |
| No                                       | 2,154 (11)  | 13, 382 (89)   | 1, 256 (14) | 6, 291 (86)   | 4,184 (53)  | 4, 310 (47)   | 1, 747 (25) | 5, 112 (75)   |
| Yes                                      | 130 (4)     | 2, 103 (96)    | 28 (4)      | 417 (96)      | 168 (33)    | 375 (67)      | 48 (14)     | 304 (86)      |
|                                          |             | P < .001       |             | P < .001      |             | P < .001      |             | P = .030      |
| <b>Household has a motorbike</b>         |             | <b>17, 768</b> |             | <b>7, 992</b> |             | <b>9, 036</b> |             | <b>7, 211</b> |
| No                                       | 883 (19)    | 3, 009 (81)    | 930 (16)    | 3, 935 (84)   | 4, 331 (52) | 4, 4639 (48)  | 1, 364 (30) | 3, 063 (70)   |
| Yes                                      | 1, 400 (8)  | 12, 476 (92)   | 354 (9)     | 2, 773 (91)   | 21 (34)     | 45 (66)       | 431 (14)    | 2, 353 (86)   |
|                                          |             | P < .001       |             | P < .001      |             | P = .078      |             | P < .001      |

139 Furthermore, there was a significant association between the use of SBA and all the independent  
 140 variables in all countries, except the variables age at last birth, knowledge on ovulation and  
 141 getting pregnant in the Philippines and the age groups in Timor-Leste (Table 2).

**Table 2: Bivariate analyses of the use of SBA (weighted frequency and percentage) in four island countries in Asia and the Pacific region**

| Country & Original observations        | Indonesia: 49, 627 | Philippines: 25, 074 | Papua New Guinea: 15, 198 | Timor-Leste: 12, 607 |
|----------------------------------------|--------------------|----------------------|---------------------------|----------------------|
| <b>Outcome variables: ANC4+ visits</b> |                    |                      |                           |                      |



| <b>Sociodemographic characteristics</b> | No: N (%)      | Yes: N (%)     | No: N (%)      | Yes: N (%)     | No: N (%)     | Yes: N (%)    | No: N (%)     | Yes: N (%)    |
|-----------------------------------------|----------------|----------------|----------------|----------------|---------------|---------------|---------------|---------------|
| <b>Age at first birth</b>               |                | <b>17, 785</b> |                | <b>10, 551</b> |               | <b>9, 204</b> |               | <b>7, 211</b> |
| <19                                     | 2,541 (74)     | 835 (26)       | 795 (23)       | 1, 895 (77)    | 1, 155 (49)   | 1,431 (51)    | 757 (54)      | 712 (46)      |
| 19-24                                   | 6, 302 (64)    | 3, 278 (37)    | 1, 123 (16)    | 4, 518 (85)    | 1, 823 (42)   | 3, 236 (58)   | 1, 783 (43)   | 2, 483 (57)   |
| >25                                     | 2, 302 (44)    | 2, 527 (56)    | 259 (8)        | 1, 961 (92)    | 520 (38)      | 1, 039 (62)   | 516 (35)      | 960 (65)      |
|                                         |                | P < .001       |                | P < .001       |               | P < .001      |               | P < .001      |
| <b>Age at first cohabitation</b>        |                | <b>17, 756</b> |                | <b>10, 206</b> |               | <b>8, 911</b> |               | <b>7, 179</b> |
| <19                                     | 3, 139 (72)    | 1, 503 (28)    | 1, 159 (24)    | 2, 703 (77)    | 1, 574 (48)   | 2, 038 (52)   | 1, 237 (52)   | 1, 268 9 (48) |
| 19-24                                   | 5, 438 (59)    | 3, 304 (41)    | 794 (13)       | 3, 841 (87)    | 1, 445 (40)   | 2, 741 (60)   | 1, 453 (40)   | 2, 185 (60)   |
| >25                                     | 1, 545 (41)    | 1, 827 (59)    | 196 (8)        | 1, 513 (92)    | 388 (42)      | 725 (58)      | 355 (34)      | 681 (66)      |
|                                         |                | P < .001       |                | P < .001       |               | P < .001      |               | P < .001      |
| <b>Age at last birth</b>                |                | <b>17, 004</b> |                | <b>10, 551</b> |               | <b>8, 662</b> |               | <b>6, 851</b> |
| <19                                     | 327 (76)       | 97 (24)        | 122 (16)       | 476 (84)       | 82 (37)       | 174 (63)      | 45 (38)       | 64 (62)       |
| 19-24                                   | 2, 572 (66)    | 1, 184 (34)    | 642 (15)       | 2, 551 (85)    | 795 (38)      | 1, 583 (62)   | 617 (40)      | 951 (60)      |
| >25                                     | 7, 760 (58)    | 5, 064 (42)    | 1, 413 (16)    | 5, 347 (84)    | 2, 410 (46)   | 3, 618 (54)   | 2, 251 (44)   | 2, 923 (56)   |
|                                         |                | P < .001       |                | P = .528       |               | P < .001      |               | P = .033      |
| <b>Age group and SBA</b>                |                | <b>17, 785</b> |                | <b>10,551</b>  |               | <b>9,204</b>  |               | <b>7,211</b>  |
| <19                                     | 328 (72)       | 109 (28)       | 78 (13)        | 319 (87)       | 96 (39)       | 216 (61)      | 71 (42)       | 102 (58)      |
| 19-24                                   | 1, 926 (66)    | 875 (34)       | 449 (16)       | 1, 767 (84)    | 646 (37)      | 1, 275 (63)   | 482 (39)      | 770 (61)      |
| 25 and above                            | 8, 891 (59)    | 5, 656 (41)    | 1, 650 (16)    | 6, 288 (84)    | 2, 756 (45)   | 4, 215 (55)   | 2, 503 (44)   | 3, 283 (56)   |
|                                         |                | P < .001       |                | P < .001       |               | P < .001      |               | P = .096      |
| <b>Place of residence</b>               |                | <b>17, 785</b> |                | <b>10, 551</b> |               | <b>9, 204</b> |               | <b>7, 211</b> |
| Urban                                   | 4, 461 (50)    | 4, 269 (50)    | 318 (8)        | 3, 009 (92)    | 184 (13)      | 1, 869 (87)   | 356 (13)      | 1, 778 (87)   |
| Rural                                   | 6, 684 (70)    | 2, 371 (30)    | 1, 859 (21)    | 5, 365 (79)    | 3, 314 (47)   | 3, 837 (53)   | 2, 700 (55)   | 2, 377 (45)   |
|                                         |                | P < .001       |                | P < .001       |               | P < .001      |               | P < .001      |
| <b>Education</b>                        |                | <b>17, 785</b> |                | <b>10, 551</b> |               | <b>9, 204</b> |               | <b>7, 211</b> |
| No education/Primary education          | 3, 661 (76)    | 1, 043 (24)    | 1, 119 (41)    | 1, 269 (59)    | 3, 151 (53)   | 3, 412 (48)   | 1, 904 (62)   | 1, 253 (38)   |
| Middle                                  | 6, 148 (59)    | 3, 740 (41)    | 886 (13)       | 4, 319 (87)    | 330 (18)      | 1, 968 (82)   | 1, 115 (33)   | 2, 353 (67)   |
| Higher                                  | 1, 336 (36)    | 1, 857 (64)    | 172 (3)        | 2, 786 (97)    | 17 (3)        | 326 (97)      | 37 (5)        | 549 (95)      |
|                                         |                | P < .001       |                | P < .001       |               | P < .001      |               | P < .001      |
| <b>Wealth</b>                           |                | <b>17, 785</b> |                | <b>10, 551</b> |               | <b>9, 204</b> |               | <b>7, 211</b> |
| Poorest/Poorer                          | 6, 498 (75)    | 1, 915 (25)    | 1, 985 (27)    | 4, 393 (73)    | 2, 009 (65)   | 1,096 (35)    | 1, 907 (67)   | 1, 037 (33)   |
| Middle                                  | 1, 955 (61)    | 1, 293 (39)    | 134 (7)        | 1, 673 (93)    | 735 (44)      | 1, 020 (56)   | 620 (44)      | 845 (56)      |
| Richest/Richer                          | 2, 692 (44)    | 3, 432 (56)    | 58 (2)         | 2, 308 (98)    | 754 (20)      | 3, 590 (80)   | 529 (18)      | 2, 273 (82)   |
|                                         |                | P < .001       |                | P < .001       |               | P < .001      |               | P < .001      |
| <b>Knowledge on ovulation</b>           |                | <b>17, 773</b> |                | <b>10, 551</b> |               | <b>9, 152</b> |               | <b>7, 211</b> |
| No                                      | 8, 797 (63)    | 4, 606 (37)    | 1, 621 (16)    | 6, 000 (84)    | 2, 875 (46)   | 4, 278 (54)   | 2, 797 (45)   | 3, 626 (56)   |
| Yes                                     | 2, 342 (50)    | 2, 028 (50)    | 556 (14)       | 2, 374 (86)    | 606 (36)      | 1, 393 (64)   | 259 (32)      | 529 (68)      |
|                                         |                | P < .001       |                | P = 0.177      |               | P < .001      |               | P < .001      |
| <b>Knowledge on getting pregnant</b>    | <b>17, 780</b> |                | <b>10, 551</b> |                | <b>9, 146</b> |               | <b>7, 211</b> |               |

|                                          |             |               |            |               |            |              |            |              |
|------------------------------------------|-------------|---------------|------------|---------------|------------|--------------|------------|--------------|
| No                                       | 4,824 (62)  | 2,602 (38)    | 407 (15)   | 1,633 (85)    | 1,572 (48) | 2,138 (52)   | 1,686 (46) | 2,135 (54)   |
| Yes                                      | 6,320 (59)  | 4,034 (41)    | 1,770 (16) | 6,741 (84)    | 1,907 (40) | 3,529 (60)   | 1,370 (41) | 2,020 (59)   |
|                                          |             | P = .012      |            | P = .657      |            | P < .001     |            | P = .007     |
| <b>Knowledge on modern contraception</b> |             | <b>17,785</b> |            | <b>10,551</b> |            | <b>9,204</b> |            | <b>7,211</b> |
| No                                       | 93 (97)     | 2 (3)         | 36 (70)    | 12 (30)       | 805 (73)   | 286 (27)     | 738 (59)   | 539 (41)     |
| Yes                                      | 11,025 (60) | 6,638 (40)    | 2,141 (16) | 8,362 (84)    | 2,693 (39) | 5,420 (61)   | 2,318 (40) | 3,616 (60)   |
|                                          |             | P < .001      |            | P < .001      |            | P < .001     |            | P < .001     |
| <b>Birth Order (BO)</b>                  |             | <b>17,785</b> |            | <b>10,551</b> |            | <b>9,204</b> |            | <b>7,211</b> |
| BO=1                                     | 3,383 (56)  | 2,463 (44)    | 388 (9)    | 2,706 (91)    | 616 (31)   | 1,663 (69)   | 523 (30)   | 1,223 (70)   |
| BO=2                                     | 3,429 (59)  | 2,161 (41)    | 447 (12)   | 2,255 (88)    | 645 (38)   | 1,314 (62)   | 567 (42)   | 859 (58)     |
| BO=2                                     | 2,145 (62)  | 1,206 (38)    | 384 (15)   | 1,480 (85)    | 661 (47)   | 999 (53)     | 532 (45)   | 672 (54)     |
| BO=3                                     | 2,188 (71)  | 810 (29)      | 958 (28)   | 1,933 (72)    | 1,576 (53) | 1,730 (47)   | 1,434 (51) | 1,401 (49)   |
|                                          |             | P < .001      |            | P < .001      |            | P < .001     |            | P < .001     |
| <b>Number of Children</b>                |             | <b>17,710</b> |            | <b>10,521</b> |            | <b>9,147</b> |            | <b>7,173</b> |
| One child                                | 2,898 (56)  | 2,165 (44)    | 247 (8)    | 2,039 (92)    | 448 (31)   | 1,186 (69)   | 309 (27)   | 795 (73)     |
| Two children                             | 3,717 (58)  | 2,419 (42)    | 426 (11)   | 2,480 (89)    | 630 (36)   | 1,475 (64)   | 580 (37)   | 1,054 (63)   |
| Three children                           | 2,355 (62)  | 1,283 (38)    | 438 (16)   | 1,719 (85)    | 721 (44)   | 1,137 (56)   | 582 (46)   | 766 (54)     |
| Four children                            | 2,128 (72)  | 745 (28)      | 1,061 (28) | 2,111 (72)    | 1,676 (53) | 1,874 (47)   | 1,572 (52) | 1,515 (48)   |
|                                          |             | P < .001      |            | P < .001      |            | P < .001     |            | P < .001     |
| <b>Household has a car</b>               |             | <b>17,775</b> |            | <b>10,551</b> |            | <b>9,182</b> |            | <b>7,211</b> |
| No                                       | 10,249 (64) | 5,293 (36)    | 2,162 (17) | 7,859 (84)    | 3,452 (45) | 5,174 (55)   | 3,010 (45) | 3,849 (55)   |
| Yes                                      | 892 (38)    | 1,341 (62)    | 15 (3)     | 515 (97)      | 38 (8)     | 518 (92)     | 46 (12)    | 306 (88)     |
|                                          |             | P < .001      |            | P < .001      |            | P < .001     |            | P < .001     |
| <b>Household has a motorbike</b>         |             | <b>17,774</b> |            | <b>10,551</b> |            | <b>9,181</b> |            | <b>7,211</b> |
| No                                       | 2,976 (73)  | 917 (27)      | 1,681 (19) | 4,963 (81)    | 3,486 (44) | 5,628 (56)   | 2,367 (54) | 2,060 (46)   |
| Yes                                      | 8,165 (58)  | 5,716 (43)    | 496 (10)   | 3,411 (90)    | 3 (2)      | 64 (98)      | 689 (25)   | 2,095 (75)   |
|                                          |             | P < .001      |            | P < .001      |            | P < .001     |            | P < .001     |

142

### 143 **Multivariable logistic regression results: factors influencing having ANC4+** 144 **visits**

145 We presented the detailed results of the logistic regression models for having ANC4+ visits in  
146 Table 3. We observed no significant association between ANC4+ visits and age at first birth or  
147 age at first cohabitation in all countries. Having ANC4+ visits showed significant association  
148 with the age at last birth only in the Philippines and Papua New Guinea. In the Philippines, the  
149 women whose age at last birth at older than 19 were more likely to use ANC4+ visits (adjusted  
150 odds ratio (aOR)= 1.94; 95% CI=1.23-3.05 among women group aged 19-24) than those whose

151 age at last birth younger than 19. On contrary, a significant relationship was seen in Papua New  
152 Guinean women of aged at last birth 19-24 were less likely to use ANC4+ visits than those  
153 younger than 19 years (aOR= 0.48; 95% CI=0.29-0.80).

154 Wealth status, having knowledge of getting pregnant, and having knowledge of modern  
155 contraception significantly predicted the use of ANC4+ visits. Wealthier women were more  
156 likely to use ANC4+ visits than those who were poor, and the highest odds ratio was seen in  
157 richer/richest women in Indonesia (aOR=2.39; 95% CI=1.84-3.11).

158 The women who had knowledge about getting pregnant were more likely to use ANC4+ visits  
159 than those who did not in all four countries. The highest odds ratio was seen in Timor-Leste  
160 (aOR= 1.48, 95% CI=1.21-1.81). Similarly, the use of ANC4+ visits showed significant  
161 associations with having knowledge of the modern contraception in all four countries; odds ratio  
162 being the highest in the Philippines (aOR= 18.40; 95% CI= 6.45 -52.52).

163 The variables such as education, place of residence, knowledge on ovulation, household  
164 ownership of a vehicle, birth order, and number of children showed different patterns of ANC4+  
165 visits in four countries. The highest odds ratio was observed among women with a higher  
166 education than those without or those with primary education in Papua New Guinea (aOR=2.06,  
167 95% CI= 1.67-2.54). The rural women in Indonesia were less likely to have ANC4+ visits than  
168 urban women (aOR=0.83, 95% CI= 0.69-1.00). However, there were no significant associations  
169 between the use of ANC4+ visits and place of residence in the Philippines, Papua New Guinea  
170 and Timor-Leste. Similarly, only Indonesia women who had knowledge on ovulation were more  
171 likely to use ANC4+ visits than those who did not have such knowledge (aOR=1.25, 95% CI=  
172 1.03-1.52). The association between ANC4+ visits and other factors such as birth order, number

173 of children, reproductive knowledge, and household ownership of a vehicle showed very  
 174 different patterns in four countries (Table 3).

**Table 3: Multivariable results: Relationship between ANC4+ and sociodemographic characteristics in four island countries in Asia and the Pacific region**

| Country name and number of observations    | Indonesia: 16,870    | Philippines: 7,660   | Papua New Guinea: 8,116 | Timor-Leste: 6,784    |
|--------------------------------------------|----------------------|----------------------|-------------------------|-----------------------|
| Sociodemographic characteristics           | aOR (95% CI)         | aOR (95% CI)         | aOR (95% CI)            | aOR (95% CI)          |
| <b>Age at first birth</b>                  |                      |                      |                         |                       |
| <19 (Reference)                            |                      |                      |                         |                       |
| 19-24                                      | 1.17 (0.92-1.49)     | 0.85 (0.65-1.12)     | 0.92 (0.73-1.17)        | 0.97 (0.72-1.30)      |
| >25                                        | 1.19 (0.79-1.81)     | 0.70 (0.43-1.16)     | 0.87 (0.62- 1.22)       | 0.94 (0.61-1.46)      |
| <b>Age at first cohabitation</b>           |                      |                      |                         |                       |
| <19 (Reference)                            |                      |                      |                         |                       |
| 19-24                                      | 1.02 (0.81-1.27)     | 1.13 (0.86-1.50)     | 0.94 (0.76-1.16)        | 1.05 (0.80-1.39)      |
| >25                                        | 0.90 (0.59-1.37)     | 1.24 (0.74-2.07)     | 1.00 (0.71-1.40)        | 1.05 (0.69-1.60)      |
| <b>Age at last birth</b>                   |                      |                      |                         |                       |
| <19 (Reference)                            |                      |                      |                         |                       |
| 19-24                                      | 1.23 (0.73-2.07)     | 1.94 (1.23-3.05) **  | 0.48 (0.29-0.80) **     | 1.50 (0.61 -3.69)     |
| >25                                        | 1.81 (0.94-3.48)     | 1.85 (1.02-3.37) *   | 0.62 (0.34-1.11)        | 1.52 (0.56-4.11)      |
| <b>Age group and ANC</b>                   |                      |                      |                         |                       |
| <19 (Reference)                            |                      |                      |                         |                       |
| 19-24                                      | 1.59 (0.94-2.69)     | 0.82 (0.51-1.31)     | 1.56 (0.93-2.63)        | 0.92(0.43-1.97)       |
| 25 and above                               | 1.83 (0.99-3.38) *   | 1.47 (0.82-2.62)     | 1.66 (0.93-2.95)        | 0.87 (0.38-2.03)      |
| <b>Place of residence</b>                  |                      |                      |                         |                       |
| Urban (Reference)                          |                      |                      |                         |                       |
| Rural                                      | 0.83 (0.69-1.00) *   | 1.04 (0.76-1.41)     | 0.84 (0.59-1.18)        | 0.79(0.56-1.11)       |
| <b>Education</b>                           |                      |                      |                         |                       |
| No education/Primary education (Reference) |                      |                      |                         |                       |
| Middle                                     | 1.47 (1.23-1.75) *** | 1.93 (1.51-2.46) *** | 2.06 (1.67-2.54) ***    | 1.54 (1.24-1.90) ***  |
| Higher                                     | 1.58 (1.15-2.17) **  | 3.11 (2.16-4.47) *** | 1.73 (0.79-3.77)        | 1.41(0.84-2.38)       |
| <b>Wealth</b>                              |                      |                      |                         |                       |
| Poorest/Poorer (Reference)                 |                      |                      |                         |                       |
| Middle                                     | 1.64 (1.30-2.06) *** | 1.30 (0.96-1.77)     | 1.41 (1.12-1.78) **     | 1.38 (1.09-1.76) **   |
| Richest/Richer                             | 2.39 (1.84-3.11) *** | 1.74 (1.18-2.57) **  | 1.55 (1.16-2.07) **     | 2.45 (1.78- 3.35) *** |
| <b>Knowledge on ovulation</b>              |                      |                      |                         |                       |
| No (Reference)                             |                      |                      |                         |                       |
| Yes                                        | 1.25 (1.03-1.52) *   | 1.04 (0.83 -1.30)    | 1.06 (0.83-1.36)        | 0.87(0.62-1.24)       |
| <b>Knowledge on getting pregnant</b>       |                      |                      |                         |                       |
| No (Reference)                             |                      |                      |                         |                       |

|                                          |                        |                        |                      |                      |
|------------------------------------------|------------------------|------------------------|----------------------|----------------------|
| Yes                                      | 1.32 (1.15-1.52) ***   | 1.31 (1.00 -1.71) *    | 1.20(1.02-1.42) *    | 1.48 (1.21-1.81) *** |
| <b>Knowledge on modern contraception</b> |                        |                        |                      |                      |
| No (Reference)                           |                        |                        |                      |                      |
| Yes                                      | 12.32 (4.82-31.49) *** | 18.40 (6.45-52.52) *** | 3.18 (2.22-4.54) *** | 2.20 (1.74-2.77) *** |
| <b>Birth Order (BO)</b>                  |                        |                        |                      |                      |
| BO=1 (Reference)                         |                        |                        |                      |                      |
| BO=2                                     | 1.43 (1.13-1.81) **    | 0.90(0.40-2.01)        | 1.06 (0.87-1.29)     | 0.95(0.79-1.16)      |
| BO=3                                     | 2.15 (1.49-3.11) ***   | 0.76 (0.27-2.14)       | 0.93 (0.68 -1.28)    | 1.05 (0.77-1.44)     |
| BO=4                                     | 2.12 (1.35-3.34) ***   | 0.55 (0.16-1.84)       | 0.88 (0.61 -1.27)    | 1.12 (0.79-1.57)     |
| <b>Number of Children</b>                |                        |                        |                      |                      |
| One child (Reference)                    |                        |                        |                      |                      |
| Two children                             | 0.48 (0.35-0.66) ***   | 0.69 (0.31-1.57)       | 0.61 (0.45-0.85) **  | 1.20 (0.87-1.66)     |
| Three children                           | 0.21 (0.13-0.32) ***   | 0.67 (0.25-1.79)       | 0.62 (0.40-0.96) *   | 0.94 (0.65-1.37)     |
| Four children                            | 0.10 (0.06-0.18) ***   | 0.70 (0.21-2.30)       | 0.56 (0.35-0.90) **  | 0.71 (0.46-1.10)     |
| <b>Household has a car</b>               |                        |                        |                      |                      |
| No (Reference)                           |                        |                        |                      |                      |
| Yes                                      | 1.28 (0.94-1.74)       | 1.91 (1.06-3.44) *     | 0.98(0.65-1.49)      | 0.69 (0.37 -1.27)    |
| <b>Household has a motorbike</b>         |                        |                        |                      |                      |
| No (Reference)                           |                        |                        |                      |                      |
| Yes                                      | 1.36 (1.13-1.63) ***   | 1.31 (1.04 -1.66) *    | 1.35 (0.51 -3.52)    | 1.26 (0.99-1.61)     |
| <b>Constant</b>                          | 0.17 (0.06-0.46) ***   | 0.10 (0.03-0.31) ***   | 0.45 (0.20-0.98) *   | 0.77 (0.41-1.46)     |

Note: \_cons estimate baseline odds. P-value: \*p < .05. \*\*p < .01. \*\*\*p < .001; aOR= adjusted Odds Ratio; 95% CI= 95% Confidence Interval

175 The association between the use of ANC4+ visits and household ownership of a car/truck was  
 176 significant only in the Philippines (aOR=1.91; 95% CI=1.06-3.44), and household ownership of  
 177 a motorbike was significant in Indonesia (aOR=1.36, 95% CI= 1.13-1.63) and the Philippines  
 178 (aOR=1.31: 95% CI= 1.35 (0.51-3.52).

## 179 **Multivariable logistic regression results: factors influencing the use of SBA**

180 Table 4 shows the result of logistic regression models for the use of SBA. There was no  
 181 significant association between utilization of SBA and the age at first birth in all countries except  
 182 in Indonesia. In Indonesia, the women aged 25 and older were 1.38 times (95% CI=1.09-1.74)  
 183 more likely to use SBA than the women who were younger than 19 and the women who age at

184 first cohabitation at aged 25 and older were 1.45 times (95% CI=1.18-1.79) more likely to use  
185 SBA than those who were younger than aged 18. Similar pattern was observed for the women  
186 with age at last birth 25 and older. They were 1.67 times (95% CI= 1.03-2.71) more likely to use  
187 SBA than the younger women aged under 19. In the Philippines, the women older than 19 at age  
188 at last birth were more likely to use SBA than those who are under 19 and the association was  
189 significant. Other two countries did not show any significant association between the use of SBA  
190 and age-related variables.

191 Place of residence, education, wealth status, and having knowledge on modern contraceptives  
192 were significant predictors for SBA use in all four countries. The women in rural areas were less  
193 likely to use SBA than those living in the urban, and the association was significant in all four  
194 countries. The more the women have education, the more likelihood of using SBA than those  
195 without education or only having primary education. We observed the highest odds ratio  
196 (aOR=8.46, 95% CI=3.93-18.23) in Papua New Guinea and the lowest odds ratio in Indonesia  
197 (aOR=2.11, 95% CI= 1.79-2.48) among women with higher education than those who did not  
198 have any education or only have primary education. Our results also showed that women in the  
199 rich group were almost two times (aOR=1.92, 95% CI= 1.66-2.21 in Indonesia) to six times  
200 (aOR=6.07, 95% CI= 3.30-11.14 in the Philippines) more likely to use SBA than the women in  
201 the poor group. Women who had knowledge of modern contraceptives were more likely to use  
202 SBA than those who did not. The highest odds ratio was seen in Indonesia (aOR=8.08, 95% CI=  
203 2.16-30.24), and the lowest odds ratio was seen in Timor-Leste (aOR=1.62, 95% CI= 1.30-2.02).  
204 The association between birth order and a woman's use of SBA and between number of children  
205 showed very different pattern in four countries. For example, we observed that the women were

206 less likely to use of SBA for their birth order at two in Timor-Leste (aOR= 0 .72, 95% CI= 0.58-  
 207 0 .89). Similarly, the women were less likely to use SBA if they have two children and more in  
 208 Indonesia and Timor-Leste, and three children in the Philippines, and the association showed  
 209 significant (Table 4).

**Table 4: Multivariable results: Relationship between use of SBA and sociodemographic characteristics in four island countries in Asia and the Pacific region**

| Country and Number of observations         | Indonesia: 16,876     | Philippines: 10,181    | Papua New Guinea: 8,249 | Timor-Leste: 6,784     |
|--------------------------------------------|-----------------------|------------------------|-------------------------|------------------------|
| Sociodemographic characteristics           | aOR (95% CI)          | aOR (95% CI)           | aOR (95% CI)            | aOR (95% CI)           |
| <b>Age at first birth</b>                  |                       |                        |                         |                        |
| <19 (Reference)                            |                       |                        |                         |                        |
| 19-24                                      | 1.06 (0.89-1.25)      | 0.87 (0.69-1.09)       | 0.93 (0.72-1.20)        | 1.07 (0.81-1.40)       |
| >25                                        | 1.38 (1.09-1.74) **   | 1.04 (0.64-1.69)       | 1.17(0.85-1.61)         | 1.24 (0.80-1.92)       |
| <b>Age at first cohabitation</b>           |                       |                        |                         |                        |
| <19 (Reference)                            |                       |                        |                         |                        |
| 19-24                                      | 1.12 (0.97-1.28)      | 1.23 (0.98-1.53)       | 1.16 (0.92-1.47)        | 1.18 (0.95-1.47)       |
| >25                                        | 1.45 (1.18-1.79) ***  | 1.04 (0.67-1.62)       | 0.92 (0.66-1.28)        | 1.23 (0.82-1.84)       |
| <b>Age at last birth</b>                   |                       |                        |                         |                        |
| <19 (Reference)                            |                       |                        |                         |                        |
| 19-24                                      | 1.31 (0.84-2.04)      | 1.77 (1.11- 2.84) **   | 0.74(0.44-1.27)         | 0 .63 (0.25-1.58)      |
| >25                                        | 1.67 (1.03-2.71) *    | 2.31 (1.23-4.33) **    | 0.59 (0.31-1.15)        | 0.62 (0.23-1.74)       |
| <b>Age group and SBA</b>                   |                       |                        |                         |                        |
| <19 (Reference)                            |                       |                        |                         |                        |
| 19-24                                      | 0.92(0.62-1.38)       | 0.47(0.28-0.79) **     | 1.17 (0.68-2.00)        | 1.33 (0 .55 -3.21)     |
| 25 and above                               | 0.81(0.53-1.26)       | 0 .49 (0.25-0.95) *    | 1.34 (0.68-2.62)        | 1.18 (0.46-2.99)       |
| <b>Place of residence</b>                  |                       |                        |                         |                        |
| Urban (Reference)                          |                       |                        |                         |                        |
| Rural                                      | 0.66 (0.58-0 .74) *** | 0 .55 (0.38-0.81) **   | 0 .49 (0.25-0.94) **    | 0.32(0.25-0.42) ***    |
| <b>Education</b>                           |                       |                        |                         |                        |
| No education/Primary education (Reference) |                       |                        |                         |                        |
| Middle                                     | 1.43 (1.27-1.62) ***  | 2.73 (2.10-3.54) ***   | 2.81 (2.15-3.68) ***    | 1.63 (1.35-1.97) ***   |
| Higher                                     | 2.11 (1.79-2.48) ***  | 6.02 (4.09-8.87) ***   | 8.46 (3.93-18.23) ***   | 5.29 (3.25-8.61) ***   |
| <b>Wealth</b>                              |                       |                        |                         |                        |
| Poorest/Poorer (Reference)                 |                       |                        |                         |                        |
| Middle                                     | 1.45 (1.26-1.66) ***  | 2.49 (1.80-3.46) ***   | 1.98 (1.60-2.44) ***    | 2.03 (1.59 - 2.58) *** |
| Richest/Richer                             | 1.92 (1.66-2.21) ***  | 6.07 (3.30 -11.14) *** | 3.62 (2.84 -4.63) ***   | 3.50 (2.66-4.62) ***   |
| <b>Knowledge on ovulation</b>              |                       |                        |                         |                        |

|                                          |                      |                      |                      |                      |
|------------------------------------------|----------------------|----------------------|----------------------|----------------------|
| No (Reference)                           |                      |                      |                      |                      |
| Yes                                      | 1.21 (1.09-1.34) *** | 0.97 (0.78 -1.21)    | 1.15 (0.92-1.44)     | 1.19 (0.88-1.61)     |
| <b>Knowledge on getting pregnant</b>     |                      |                      |                      |                      |
| No (Reference)                           |                      |                      |                      |                      |
| Yes                                      | 0.93 (0.85-1.02)     | 0.93(0.71-1.23)      | 1.08 (0.90-1.29)     | 0.78 (0.66-0.92) **  |
| <b>Knowledge on modern contraception</b> |                      |                      |                      |                      |
| No (Reference)                           |                      |                      |                      |                      |
| Yes                                      | 8.08 (2.16-30.24) ** | 5.67 (1.59-20.24) ** | 2.27 (1.63-3.16) *** | 1.62 (1.30-2.02) *** |
| <b>Birth Order (BO)</b>                  |                      |                      |                      |                      |
| BO=1 (Reference)                         |                      |                      |                      |                      |
| BO=2                                     | 1.07 (0.91-1.26)     | 0.86 (0.65-1.14)     | 0.75(0.60-0.95) **   | 0.72(0.58-0.89) **   |
| BO=3                                     | 1.38 (1.09- 1.74) ** | 1.07 (0.77 -1.49)    | 0.55(0.38-0.78) ***  | 0.85 (0.61-1.18)     |
| BO=4                                     | 1.73 (1.28-2.34) *** | 0.82 (0.50-1.34)     | 0.58 (0.39-0.87) **  | 0.90 (0.61 -1.34)    |
| <b>Number of Children</b>                |                      |                      |                      |                      |
| One child (Reference)                    |                      |                      |                      |                      |
| Two children                             | 0.80 (0.67-0.95) **  | 0.85 (0.58-1.23)     | 1.09 (0.76-1.55)     | 0.75(0.56- 0.99) *   |
| Three children                           | 0.59 (0.46-0.75) *** | 0.55 (0.36-0.84) **  | 1.01 (0.66-1.54)     | 0.58 (0.40-0.85) **  |
| Four children                            | 0.36 (0.26-0.50) *** | 0.42 (0.25- 0.72) ** | 0.91 (0.57- 1.44)    | 0.49 (0.30-0.79) **  |
| <b>Household has a car</b>               |                      |                      |                      |                      |
| No (Reference)                           |                      |                      |                      |                      |
| Yes                                      | 1.43 (1.25-1.65) *** | 0.80 (0.32-2.00)     | 1.99 (1.02-3.87) *   | 1.37 (0.83-2.25)     |
| <b>Household has a motorbike</b>         |                      |                      |                      |                      |
| No (Reference)                           |                      |                      |                      |                      |
| Yes                                      | 1.17 (1.03-1.33) **  | 1.11 (0.86-1.42)     | 8.99 (1.96-41.29) ** | 1.21 (0.98-1.49)     |
| Constant                                 | 0.03 (.01- 0.12) *** | 0.72 (0.19-2.81)     | 0.88 (0.34-2.25)     | 1.75 (0.99-3.08) *   |

Note: \_cons estimate baseline odds. P-value: \*p < .05. \*\*p < .01. \*\*\*p < .001; aOR= adjusted Odds Ratio; 95% CI= 95% Confidence Interval

210 The association between the use of SBA and two reproductive knowledge-related questions  
 211 (knowledge on getting pregnant, and knowledge on ovulation), and household ownership of a  
 212 vehicle showed different patterns in these four countries. The women who had knowledge on  
 213 ovulation were more likely to use SBA than those who did not have, and the association was  
 214 significant only in Indonesia (aOR= 1.21, 95% CI: 1.09-1.34). The women who had knowledge  
 215 on getting pregnant after birth before the first period were less likely to use SBA than those who  
 216 did not have, and the association was significant only in Timor-Leste (aOR=0.78, 95% CI=0.66-



217 0.92). Women who had a car or motorcycle were more likely to use SBA than those who did not  
218 have, and the association was significant only in Indonesia and Papua New Guinea (Table 4).  
219 We also tested different models to see if the inclusion of four age-related variables has  
220 multicollinearity effect. Since there is no significant increment in standard error (SE) of tested  
221 models, we assumed no multicollinearity in our models.

## 222 **Discussion**

223 The primary purpose of this study was to analyze the associations between the age at first birth  
224 and utilization of two main outcome variables: (a) use of ANC4+ visits during pregnancy and (b)  
225 SBA at the time of delivery. We also examined the relationship between social determinants and  
226 two main outcome variables. Compared to other high and upper-middle income countries in Asia  
227 and the Pacific region, where almost all births used SBA, this finding highlighted an urgent need  
228 to find out the reasons the women did not use SBA, the quality of health information given  
229 during the ANC visits, or other influencing factors including cultural practices in all these four  
230 countries (Indonesia, the Philippines, Papua New Guinea, and Timor-Leste) to reduce the  
231 maternal deaths.

### 232 **Having antenatal care four or more (ANC4+) visits**

233 The low percentage of women having ANC4+ visits especially in Papua New Guinea (48%)  
234 indicated that there is ample room to enhance pregnancy-related health outcomes. A study  
235 conducted in Papua New Guinea found several barriers to regular antenatal care: distance to  
236 health facility, cost, quality of care, and women's limited knowledge on the benefit of ANC  
237 visits (18).

238 In 2016, WHO recommended ANC visits increased from ANC4+ to ANC8+. And therefore, we  
239 also examined the data on ANC8+ visits (4). However, even with ANC4+ visits, women in these  
240 countries faced a lot of barriers. If we want to achieve the new recommended ANC visit  
241 coverage target (i.e., 90% of pregnant women to have ANC8+ visits by 2030), the respective  
242 governments will have to put forth extra effort (4).

243 Findings of no significant association of having ANC4+ visits among women who had their first  
244 age at birth in all four countries is consistent with mixed findings from different studies (18-20).  
245 Our findings on the likelihood of using ANC4+ visits were significantly lower among women  
246 who started childbearing at a younger age than those who started at an older age was contrary to  
247 a study in Nigeria, where older women were less likely to have ANC visits, but not in Ethiopia,  
248 suggesting that different underlying mechanisms drives the women's ANC utilization (19). The  
249 culture of decision-making of the husband or elders may have influenced the younger women's  
250 decision on health care use, which reminds us that future interventions may benefit by including  
251 family members (9, 18, 20).

252 The significant association between the use of ANC4+ visits and factors such as having higher  
253 education and being wealthier were consistent with previous studies conducted in Senegal and  
254 Nigeria, suggesting that there was a huge health disparity on accessibility to care in these island  
255 countries (6, 19). Our results on the greater likelihood of using ANC4+ visits among the women  
256 who had reproductive health knowledge was a new finding. In the ANC4+ visits model, talking  
257 about contraception was covered at the third visit; perhaps providing reproductive health  
258 knowledge to any women of childbearing age could be beneficial (7).

259 Women at their first pregnancy, especially in Indonesia, were less likely to use ANC4+ visits  
260 than those with subsequent pregnancies highlighted a need to find strategies to reach ungravida  
261 women, who face greater life-threatening risks in pregnancy (6). The significant association  
262 between a vehicle ownership and use of ANC4+ visits in a couple of countries such as the  
263 Philippines and Indonesia illustrated a need to explore alternative strategies for pregnant women  
264 who did not have any vehicles.

### 265 **Use of skilled birth attendants (SBA)**

266 Compared to women's utilization on ANC4+ visits, the use of SBA was low in all countries  
267 ranging from 40% in Indonesia to 84% in the Philippines, signaling health systems in the need  
268 for those countries to put forth extra effort to reach 90% SBA coverage. A significant association  
269 between SBA use at the time of delivery and the age at first birth was observed only among  
270 Indonesian women aged 25 and older, highlighting a need to have more information.

271 The findings of a positive association between the use of SBA and social determinants such as  
272 living in urban areas, having higher education, and being wealthier in all four countries were  
273 consistent with the findings from a previous study in low to middle-income countries in other  
274 regions suggesting a need to strategies to reach their counterparts (21). Similarly, the fact that the  
275 women who have two or more children in Indonesia, the Philippines, and Timor-Leste were less  
276 likely to use SBA was consistent with similar findings from a study conducted in Tanzania  
277 which also suggested that there is a need to educate to women that every pregnancy is at risk and  
278 need to have health care services (22).

279 A novel finding related to women who had knowledge of modern contraception were more likely  
280 to utilize SBA at the time of delivery in all four countries suggests that providing such

281 information to every potential pregnant woman could benefit for their own health although  
282 further studies might be useful. Reasons women did not use the SBA at the time of delivery  
283 could be multiple: lack of maternal and child health care providers or services in rural areas or  
284 providers' gender or availability of health insurance, trust in Traditional Birth Attendants and  
285 transportation (20, 23, 24). Although DHS data we used did not collect variables related to  
286 gender or health insurance, we expected that highlighting these variables as potential barriers  
287 could increase the decision makers' awareness on these regards in their policy setting or program  
288 implementation, and we discussed more details in the following paragraphs. In 2017-2018, the  
289 three countries except Papua New Guinea exceeded the WHO recommendation of 23 per 10,000  
290 population, who were present mostly in the urban cities, showing a huge urban/rural disparity for  
291 maternal health services (8). See more the detail of skilled health care workers versus population  
292 ratio in those countries in the Table 5.

---

**Table 5: Skilled Health Care workers per 10,000 population in the Asia and the Pacific region and four island countries (2017-2018)**

---

|                                 | Asia and the Pacific region | Indonesia | Papua New Guinea | Timor-Leste | Philippines |
|---------------------------------|-----------------------------|-----------|------------------|-------------|-------------|
| Physician per 10,000 Population | 16 *                        | 4         | 1                | 7           | 6 *         |
| Nurses/midwives                 | 34                          | 24        | 5                | 17          | 49          |

---

Available data: \* denotes 2017; other data= 2018 data (World Bank, n.d)

---

293  
294 The gender of the SBA could be another influencing factor. A study found that women in PG  
295 were reluctant to go to health facilities to give birth because the midwife was a male staff  
296 member (25). This information pointed out a need to explore the relationship between gender of  
297 SBA and the use of SBA by pregnant women in all these countries.

298 Health insurance in these countries may also play an influential role in using ANC services and  
299 SBA (13, 14, 26-28). In 2018 in Indonesia, only 77% of the population was covered by health  
300 insurance program (*Jaminan Kesehatan Nasional- JKN*) which is mostly for curative services  
301 (28). In the Philippines, the government established health insurance (Philhealth) covered almost  
302 100% of the population (about 108 million members) in 2019 (13). In Timor-Leste, all the health  
303 services are free (27). In the Philippines, health insurance is voluntary and private, giving access  
304 only to the wealthier people (26).

305 Studies in Indonesia and Philippines found that pregnant women in some parts of those countries  
306 were more likely to use traditional birth attendants rather than SBA, which could be one of the  
307 factors in the limited use of SBA in the rural community (23).

308 The association between the use of SBA at the time of delivery and the other variables (such as  
309 age at first cohabitation, age at last birth, age groups, birth order, household ownership of a  
310 car/truck, and a motorcycle/scooter) showed a different pattern of results in these countries. The  
311 findings on these different patterns were consistent with a previous study (29). Country specific  
312 interventions may be worthwhile to address different age groups' use of SBA (29).

313 The mixed findings on association between the birth order and use of SBA in Papua New  
314 Guinea, Indonesia, and Timor-Leste highlight a need to explore more in this regard although a  
315 previous study from Nigeria found that the women used SBA in their first to six births compared  
316 to those who had more than seven births (21). Association between knowledge on getting  
317 pregnant and use of SBA showed significant only in Timor-Leste. Also, there were significant  
318 association that Indonesian women having knowledge on ovulation were more likely to use SBA  
319 than those who did not have. To our knowledge, these two facts were new findings. Our result

320 regarding the association between having a vehicle and use of SBA in Indonesia and Papua New  
321 Guinea was consistent with findings from a previous study, in which women with transportation  
322 difficulty were less likely to use SBA than those who did not, although their study used road  
323 condition as a proxy indicator for transportation barrier (20).

324 Although our data did not have any traditional and cultural related information, we could not  
325 ignore the importance of their roles. Tradition and culturally accepted practices play an  
326 influential role in using MCH services, with regional variation within each country (20, 23, 25).  
327 In Timor-Leste, decision-making by elders from the family and cultural attitudes towards  
328 reproductive health information and services could either be a facilitator or barrier of women's  
329 access to MCH services (20). In Papua New Guinea, transportation was a barrier mentioned by  
330 the women as they worried childbirth happened in a vehicle (25, 30). There, the cultural beliefs  
331 among some people such as blood from childbirth could poison men and have a polluting effect,  
332 etc., which made it difficult to have a vehicle to go to the health facilities and subsequent usage  
333 of SBA (25, 30).

### 334 **Strengths and limitations**

335 The strength of this study is the utilization of four nationally representative samples. To our  
336 knowledge, this is the first study focusing exclusively on island countries in the Asia and Pacific  
337 region. However, a causal relationship between the outcome variables and independent variables  
338 cannot be established as this is a cross-sectional study.

### 339 **Conclusions**

340 The results from this study demonstrated that education, wealth status, knowledge on modern  
341 contraception, and place of residence were significant predictors for having ANC4+ visits and

342 use of SBA in all four countries. Our findings regarding the significant association between  
343 knowledge on modern contraception and the use of ANC visits and SBA are novel findings that  
344 had not been previously examined in these island countries. Providing such knowledge for the  
345 adolescents in these countries could enhance their knowledge and use of MCH services as  
346 recommended. Also, the age at first birth was significantly associated with the use of ANC visits  
347 in Papua New Guinea, ensuring the use of MCH services at a young age at first birth could also  
348 help younger women to recognize pregnancy-related life-threatening risk and further prevent  
349 maternal morbidity and mortality.

## 350 **References**

- 351 1. United Nations Maternal Mortality Estimation Inter-Agency Group (UNMMEIG). Trend  
352 in maternal mortality: 2000 to 2017: estimates by WHO, UNICEF, UNFPA, World Bank Group  
353 and the United Nations Population Division. Geneva; 2019.
- 354 2. Pirkle CM, de Albuquerque Sousa AC, Alvarado B, Zunzunegui MV, IMIAS Research  
355 Group. Early maternal age at first birth is associated with chronic diseases and poor physical  
356 performance in older age: cross-sectional analysis from the International Mobility in Aging  
357 Study. *BMC Public Health*. 2014;14:293.
- 358 3. United Nations. Sustainable Development Goals n.d. [Available from:  
359 <https://www.un.org/sustainabledevelopment/development-agenda-retired/>. .
- 360 4. (WHO) WHO. New global targets to prevent maternal deaths 2021 [updated October 5,  
361 2021. Available from: [https://www.who.int/news/item/05-10-2021-new-global-targets-to-](https://www.who.int/news/item/05-10-2021-new-global-targets-to-prevent-maternal-deaths)  
362 [prevent-maternal-deaths](https://www.who.int/news/item/05-10-2021-new-global-targets-to-prevent-maternal-deaths).

- 363 5. (WHO) WHO. WHO Recommendations on Antenatal Care for a Positive Pregnancy  
364 Experience: Summary. Geneva, Switzerland: WHO; 2018.
- 365 6. Garenne M, Mbaye K, Bah MD, Correa P. Risk factors for maternal mortality: a case-  
366 control study in Dakar hospitals (Senegal). *Afr J Reprod Health*. 1997;1(1):14-24.
- 367 7. Mchenga M, Burger R, von Fintel D. Examining the impact of WHO's Focused Antenatal  
368 Care policy on early access, underutilisation and quality of antenatal care services in Malawi: a  
369 retrospective study. *BMC Health Serv Res* 2019;19(1):295.
- 370 8. Bank W. Indicators. 2019 n.d. [Available from:  
371 <https://data.worldbank.org/indicator/SP.POP.TOTL.FE.ZS>.
- 372 9. Cultural Atlas. Cultural Profiles n.d. [Available from:  
373 <https://culturalatlas.sbs.com.au/countries>.
- 374 10. One world nations online. Culture:Timor-Leste n.d. [Available from:  
375 [https://www.nationsonline.org/oneworld/timor\\_leste.htm#Culture](https://www.nationsonline.org/oneworld/timor_leste.htm#Culture)
- 376 11. OECD/World Health Organization. “Pregnancy and birth”, in *Health at a Glance:  
377 Asia/Pacific 2018: Measuring Progress towards Universal Health Coverage*. Paris; 2018.
- 378 12. National Population and Family Planning Board (BKKBN), Statistics Indonesia (BPS),  
379 Ministry of Health (Kemenkes), ICF International. *Indonesia Demographic and Health Survey  
380 2017*. Jakarta, Indonesia; 2018.



- 381 13. Philippine Statistics Authority (PSA), ICF International. Philippines National  
382 Demographic and Health Survey 2017. Quezon City, Philippines & Rockville, Maryland, USA;  
383 2018.
- 384 14. General Directorate of Statistics (GDS), Ministry of Health, ICF International. Timor-  
385 Leste Demographic and Health Survey 2016. Dili, Timor-Leste and Rockville, Maryland, USA;  
386 2018.
- 387 15. National Statistical Office (NSO) Papua New Guinea, ICF International. Papua New  
388 Guinea Demographic and Health Survey 2016-18. National Statistical Office (NSO) [Papua New  
389 Guinea] and ICF. 2019. Papua New Guinea Demographic and Health Survey 2016-18. : NSO  
390 and ICF. ; 2019.
- 391 16. Demographic Health Surveys. DHS Methodology. 2020 [Available from:  
392 <https://dhsprogram.com/What-We-Do/Survey-Types/DHS-Methodology.cfm>.]
- 393 17. StataCorp Ltd. Stata College Station, Texas2021 [Available from:  
394 <https://www.stata.com/>.
- 395 18. Andrew EV, Pell C, Angwin A, Auwun A, Daniels J, Mueller I, et al. Factors affecting  
396 attendance at and timing of formal antenatal care: results from a qualitative study in Madang,  
397 Papua New Guinea. PLoS One 2014;9(5):e93025.
- 398 19. Fagbamigbe AF, Idemudia ES. Wealth and antenatal care utilization in Nigeria: Policy  
399 implications. Health Care Women Int. 2017;38(1):17-37.

- 400 20. King R, Jones L. Key factors deterring women's engagement with skilled birth attendants  
401 in three districts of Timor-Leste. A qualitative descriptive study. *Midwifery*. 2019;79:102555.
- 402 21. Fagbamigbe AF, Hurricane-Ike EO, Yusuf OB, Idemudia ES. Trends and drivers of  
403 skilled birth attendant use in Nigeria (1990-2013): policy implications for child and maternal  
404 health. *Int J Womens Health*. 2017;9:843-53.
- 405 22. Damian DJ, Tibelerwa JY, John B, Philemon R, Mahande MJ, Msuya SE. Factors  
406 influencing utilization of skilled birth attendant during childbirth in the Southern highlands,  
407 Tanzania: a multilevel analysis. *BMC Pregnancy Childbirth*. 2020;20(1):420.
- 408 23. Maghuyop-Butalid R, Mayo NA, Polangi HT. Profile and birthing practices of Maranao  
409 traditional birth attendants. *Int J Womens Health*. 2015:859-64.
- 410 24. Titaley CR, Hunter CL, Dibley MJ, Heywood P. Why do some women still prefer  
411 traditional birth attendants and home delivery?: a qualitative study on delivery care services in  
412 West Java Province, Indonesia. *BMC Pregnancy Childbirth*. 2010 Aug 11;10:43.
- 413 25. Fiti-Sinclair R. Childbirth in Papua New Guinean Village and in Port Moresby General  
414 Hospital. In: Vicki L, Margaret J, editors. *Birthing in the Pacific: Beyond tradition and  
415 modernity?* Honolulu: University of Hawai'i Press; 2002. pp.56-78.
- 416 26. Grundy J, Dakulala P, Wai K, Maalsen A, Whittaker M. Independent State of Papua New  
417 Guinea health system review. *Health Systems in Transition*. 2019; 9(1).
- 418 27. Kelly M, Pereira DSS, Ferreira D. *Australia Timor-Lest Health Review Report*. 2019.

- 419 28. Mahendradhata Y, Trisnantoro ML, Listyadewi S, Soewondo P, Marthias T, Harimurti P,  
420 et al. Chapter 3: Health Financing: Summary. The Republic of Indonesia health system review:  
421 Health Systems in Transition. 2017; 7(1).
- 422 29. Godha D, Gage AJ, Hotchkiss DR, Cappa C. Predicting Maternal Health Care Use by  
423 Age at Marriage in Multiple Countries. J Adolesc Health. 2016 May 1;58(5):504-11.
- 424 30. Vallely LM, Homiehombo P, Kelly-Hanku A, Vallely A, Homer CS, Whittaker A.  
425 Childbirth in a rural highlands community in Papua New Guinea: a descriptive study. Midwifery.  
426 2015 March 1;31(3):380-7.
